# Supplementary material for: Retail Food Environment around Schools in Barcelona by Neighborhood Socioeconomic Status: Implications for Local Food Policy
Source: MDPI journal article supplement (doi:10.3390/ijerph20010649), 2022-12-30
Supplement: s1 [file s1]

**Table S1.** Healthy Food Availability Index (HFAI) using Nutrition Environment Measurement Survey in Store for Mediterranean contexts (NEMS-S-MED).

| Item         | Store type                          |                                        |                                             |                                |                                 |                              |                                                  | p-Value <sup>2</sup> |
|--------------|-------------------------------------|----------------------------------------|---------------------------------------------|--------------------------------|---------------------------------|------------------------------|--------------------------------------------------|----------------------|
|              | Supermarkets <sup>1</sup><br>(n=18) | Convenience Stores <sup>1</sup> (n=36) | Fruit and Vegetables <sup>1</sup><br>(n=26) | Butcheries <sup>1</sup> (n=32) | Fishmongers <sup>1</sup> (n=16) | Bakeries <sup>1</sup> (n=23) | Other specialized food stores <sup>1</sup> (n=2) |                      |
| Availability | 26 (20-31)                          | 7 (4-14)                               | 8 (8-12)                                    | 3 (1-8)                        | 4 (4-4)                         | 1 (0-2)                      | 1 (0-2)                                          | 0.0001               |
| Price        | 6 (4-8)                             | 0 (0-2)                                | 0 (0-0)                                     | 0 (0-0)                        | 0 (0-0)                         | 0 (0-0)                      | 0 (0-0)                                          | 0.0001               |
| Total Score  | 31 (26-41)                          | 7 (4-16)                               | 8 (8-12)                                    | 3 (1-8)                        | 4 (4-4)                         | 1 (0-2)                      | 1 (0-2)                                          | 0.0001               |

<sup>1</sup> Median (interquartile range), <sup>2</sup> p-values correspond to Kruskal-Wallis test.

**Table S2.** Association between the Healthy Food Availability Index (HFAI) of each food establishment and the socioeconomic status of schools at the neighborhood level.

|                                                                     | IRR <sup>1</sup> | 95% CI      | p-Value |
|---------------------------------------------------------------------|------------------|-------------|---------|
| <b>NSES</b>                                                         |                  |             |         |
| Low-SES                                                             | 1.08             | (0.96-1.23) | 0.181   |
| Middle                                                              | ref              |             |         |
| High-SES                                                            | 1.67             | (1.45-1.91) | 0.000   |
| <b>Population density (10<sup>3</sup> residents/km<sup>2</sup>)</b> |                  |             |         |
| Medium                                                              | 0.92             | (0.81-1.04) | 0.191   |
| High                                                                | 0.73             | (0.64-0.84) | 0.000   |

<sup>1</sup>IRR = incidence rate ratio, 95% CI = 95% confidence interval, NSES: neighborhood socioeconomic status. All estimates are mutually adjusted for distance and all variables listed using Poisson regression.
